# Supplementary material for: Development of a bioactive tunable hyaluronic-protein bioconjugate hydrogel for tissue regenerative applications
Source: Royal Society of Chemistry journal article supplement (doi:10.1039/d2tb02766f), 2023-01-01
Supplement: d2tb02766f1.pdf [file d2tb02766f1.pdf]

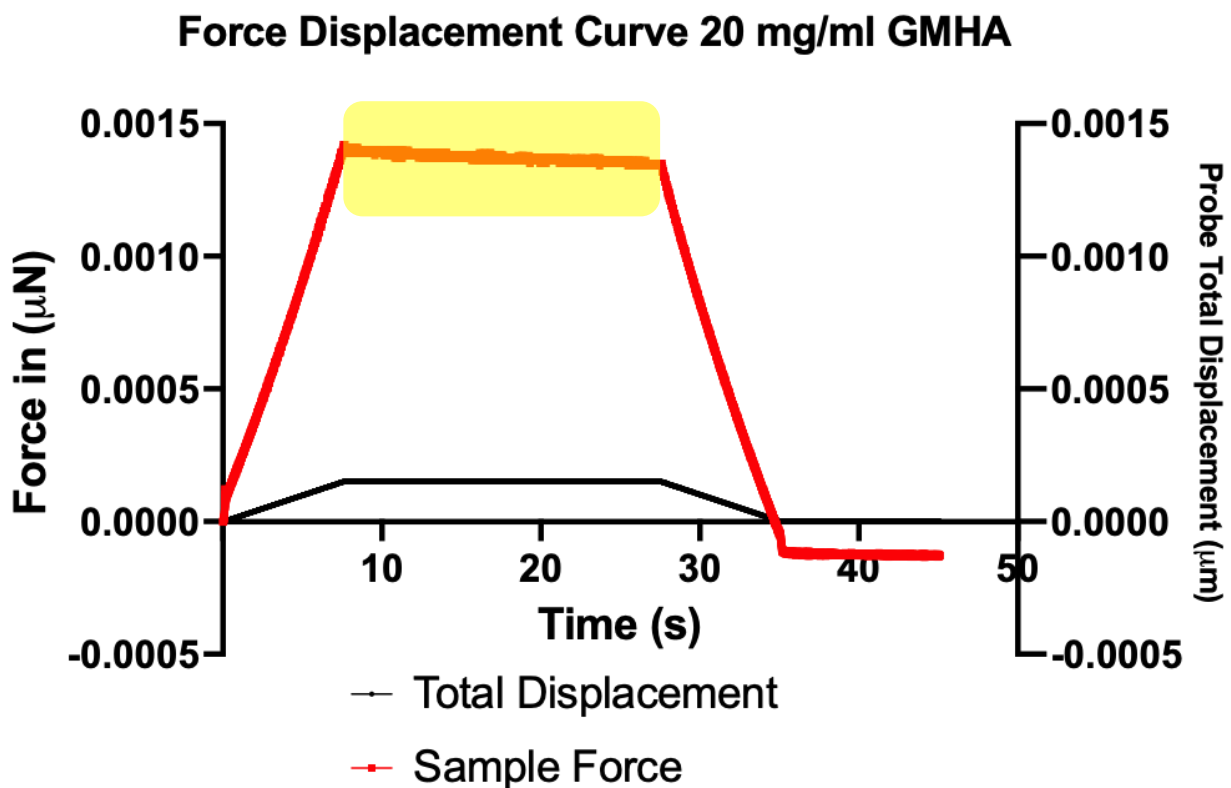

Supplemental Figure 1. Force displacement curve for 20 mg/ml GMHA. Highlighted section illustrates the relaxation data used to fit the Hertz contact model to the linear solid model for indentation analysis.

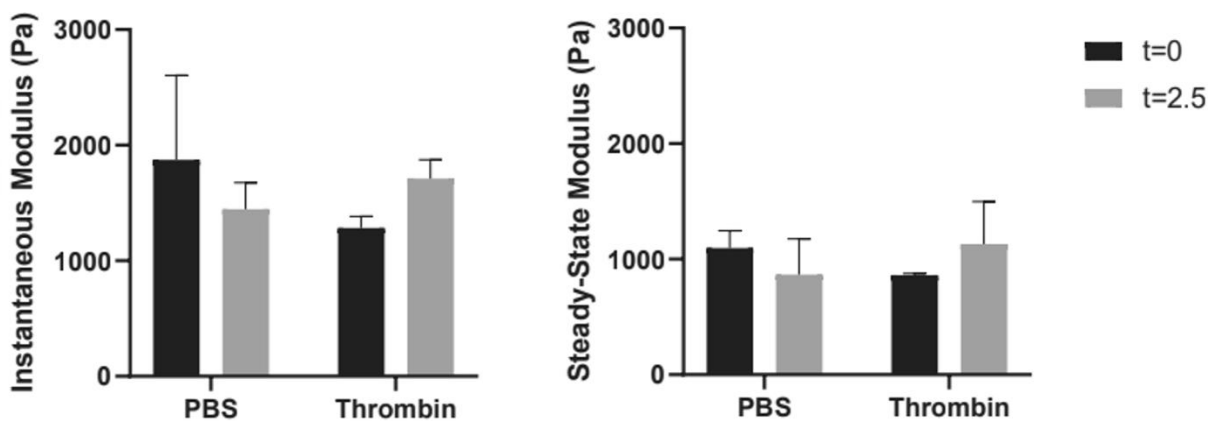

Supplemental Figure 2. Indentation analysis of GMHA-Fib hydrogels before and 2.5 h after crosslinking in thrombin solution. No significant differences were observed between treatments, indicating that fibrin crosslinking does not contribute to mechanical stiffness.

**A** Steady-State Analysis Comparison of 7.5 mg/ml and 20mg/ml GMHA and 60 mg/ml GMHA-Fib **B**

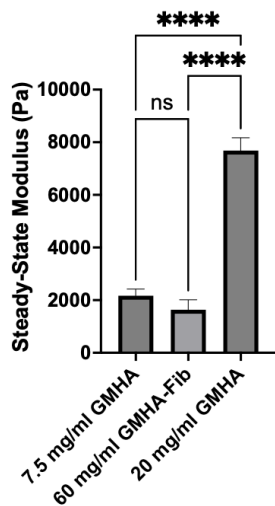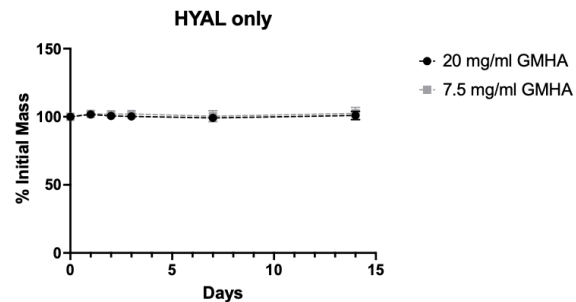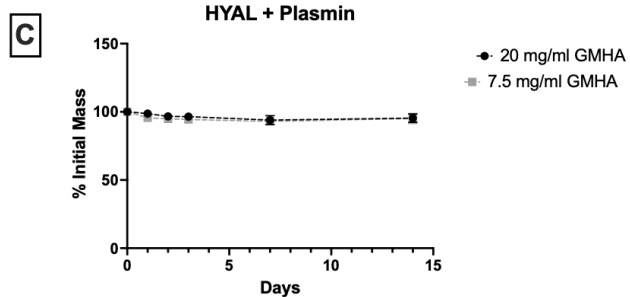

Supplemental Figure 3. A) Steady-state modulus comparing 60 mg/ml GMHA-Fib to 7.5 mg/ml and 20 mg/ml GMHA. There are no significant differences observed between the mechanical properties of 60 mg/ml GMHA-fib and 7.5 mg/ml GMHA, \*\*\*\* $p < 0.0001$ , n.s.= not significant. Degradation behavior of 20 mg/ml and 7.5 mg/ml GMHA in the presence of B) 0.1 U hyaluronidase and C) 0.1 U hyaluronidase + 0.1 U plasmin. No significant differences were observed in degradation behavior between 20 mg/ml and 7.5 mg/ml GMHA in either enzymatic solution.
